# Supplementary material for: Quantitative Multiplex Real-Time Reverse Transcriptase–Polymerase Chain Reaction with Fluorescent Probe Detection of Killer Immunoglobulin-Like Receptors, KIR2DL4/3DL3
Source: MDPI journal article supplement (doi:10.3390/diagnostics10080588), 2020-08-13
Supplement: s1 [file s1]

**Table 1.** Total number of alleles of 17 KIR genes.

| KIR Gene | Number<br>of<br>Alleles | KIR<br>Gene | Number<br>of<br>Alleles |
|----------|-------------------------|-------------|-------------------------|
| KIR2DL1  | 111                     | KIR2DS4     | 39                      |
| KIR2DL2  | 34                      | KIR2DS5     | 24                      |
| KIR2DL3  | 64                      | KIR2DP1     | 40                      |
| KIR2DL4  | 109                     | KIR3DL1     | 184                     |
| KIR2DL5A | 21                      | KIR3DL2     | 165                     |
| KIR2DL5B | 37                      | KIR3DL3     | 166                     |
| KIR2DS1  | 17                      | KIR3DS1     | 39                      |
| KIR2DS2  | 24                      | KIR3DP1     | 29                      |
| KIR2DS3  | 16                      |             |                         |

**Table 2.** The percent identities between mRNA nucleotide sequences of KIRs.

| .             | 2DL1*001 | 2DL2*0010101 | 2DL3*0010101 | 2DL4*00101 | 2DL5A*0010101 | 2DS1*001 | 2DS2*0010101 | 2DS3*00101 | 2DS4*0010101 | 2DS5*001 | 3DL1*0010101 | 3DL2*0010101 | 3DL3*00101 |
|---------------|----------|--------------|--------------|------------|---------------|----------|--------------|------------|--------------|----------|--------------|--------------|------------|
| 2DL2*0010101  | 96.94    |              |              |            |               |          |              |            |              |          |              |              |            |
| 2DL3*0010101  | 95.80    | 97.75        |              |            |               |          |              |            |              |          |              |              |            |
| 2DL4*00101    | 77.64    | 77.15        | 77.95        |            |               |          |              |            |              |          |              |              |            |
| 2DL5A*0010101 | 79.88    | 79.79        | 80.44        | 88.12      |               |          |              |            |              |          |              |              |            |
| 2DS1*001      | 96.38    | 94.41        | 95.08        | 75.67      | 77.12         |          |              |            |              |          |              |              |            |
| 2DS2*0010101  | 94.74    | 96.82        | 97.49        | 76.23      | 78.57         | 96.50    |              |            |              |          |              |              |            |
| 2DS3*00101    | 93.64    | 93.75        | 94.21        | 74.48      | 76.90         | 95.85    | 95.85        |            |              |          |              |              |            |
| 2DS4*0010101  | 93.20    | 93.20        | 93.77        | 76.67      | 78.12         | 95.52    | 95.63        | 93.77      |              |          |              |              |            |
| 2DS5*001      | 93.86    | 92.98        | 93.88        | 74.89      | 77.01         | 95.74    | 95.08        | 96.72      | 93.44        |          |              |              |            |
| 3DL1*0010101  | 88.25    | 88.35        | 88.30        | 75.02      | 76.82         | 85.57    | 86.99        | 84.92      | 85.68        | 84.81    |              |              |            |
| 3DL2*0010101  | 87.20    | 86.72        | 87.33        | 75.14      | 76.50         | 85.03    | 85.79        | 84.70      | 85.46        | 84.37    | 93.03        |              |            |
| 3DL3*00101    | 83.81    | 83.70        | 84.70        | 72.63      | 73.95         | 82.41    | 83.10        | 80.90      | 82.75        | 81.37    | 86.70        | 87.43        |            |
| 3DS1*010      | 84.59    | 84.82        | 85.10        | 70.69      | 72.11         | 84.64    | 86.12        | 84.30      | 84.76        | 84.07    | 97.34        | 91.32        | 84.64      |

1  
2  
3  
4

**Table 3.** The reproducibility and cross reactivity assessment.

| Template DNA<br>copies             | KIR2DL4 |      |      | KIR3DL3 |      |      | RPII  |      |      |
|------------------------------------|---------|------|------|---------|------|------|-------|------|------|
|                                    | Mean    | SD   | %CV  | Mean    | SD   | %CV  | Mean  | SD   | %CV  |
| Singleplex qRT-PCR ( <i>n</i> = 6) |         |      |      |         |      |      |       |      |      |
| 5 × 10 <sup>1</sup>                | 37.91   | 0.80 | 2.11 | 41.79   | 2.68 | 6.41 | 37.08 | 0.70 | 1.89 |
| 5 × 10 <sup>2</sup>                | 35.24   | 0.54 | 1.55 | 35.26   | 0.45 | 1.29 | 33.80 | 0.74 | 2.19 |
| 5 × 10 <sup>3</sup>                | 32.01   | 0.63 | 1.96 | 32.50   | 0.42 | 1.30 | 30.08 | 0.34 | 1.12 |
| 5 × 10 <sup>4</sup>                | 29.39   | 0.63 | 2.14 | 29.17   | 0.44 | 1.52 | 26.54 | 0.18 | 0.66 |
| 5 × 10 <sup>5</sup>                | 25.59   | 0.31 | 1.20 | 26.02   | 0.59 | 2.26 | 23.77 | 0.24 | 1.01 |
| 5 × 10 <sup>6</sup>                | 22.30   | 0.61 | 2.72 | 22.92   | 0.69 | 3.00 | 20.68 | 0.26 | 1.26 |
| 5 × 10 <sup>7</sup>                | 18.81   | 0.39 | 2.08 | 19.46   | 0.86 | 4.40 | 17.06 | 0.40 | 2.37 |
| 5 × 10 <sup>8</sup>                | 16.11   | 0.57 | 3.57 | 16.14   | 0.80 | 4.96 | 14.36 | 0.10 | 0.72 |
| Irrelevant plasmid                 | 44.15   | 1.12 | 2.53 | 44.06   | 1.72 | 3.91 | 44.12 | 1.44 | 3.27 |
| Cross-reactivity ( <i>n</i> = 3)   |         |      |      |         |      |      |       |      |      |
| 5x10 <sup>7</sup> KIR2DL4          | -       | -    | -    | 37.00   | 0.54 | 1.46 | 44.67 | 0.53 | 1.20 |
| 5x10 <sup>7</sup> KIR3DL1          | 36.44   | 0.65 | 1.78 | 35.76   | 0.25 | 0.69 | 44.65 | 0.88 | 1.97 |
| 5x10 <sup>7</sup> KIR3DL3          | 37.50   | 0.52 | 1.38 | -       | -    | -    | 45.01 | 0    | 0    |
| 5x10 <sup>8</sup> RPII             | 44.72   | 0.70 | 1.57 | 44.94   | 0.16 | 0.36 | -     | -    | -    |

Mean; Mean of Cycle Time (C<sub>T</sub>); SD; Standard deviation; % CV; The percentage of Coefficient of Variation (between run).

5

**Table 4.** Reproducibility assessment of reference gene in multiplex assays.

| Template DNA<br>Copies                 | KIR2DL4 |      |      | KIR3DL3 |      |       | RPII                      |      |      |
|----------------------------------------|---------|------|------|---------|------|-------|---------------------------|------|------|
|                                        | Mean    | SD   | %CV  | Mean    | SD   | %CV   | Mean                      | SD   | %CV  |
| <i>n</i> = 3 (0.4 μM primer and probe) |         |      |      |         |      |       | (5x10 <sup>2</sup> ) RPII |      |      |
| 5 × 10 <sup>2</sup>                    | 44.99   | 4.10 | 9.11 | 43.61   | 4.55 | 10.43 | 33.98                     | 0.21 | 0.62 |
| 5 × 10 <sup>3</sup>                    | 31.28   | 0.95 | 3.04 | 32.11   | 0.80 | 2.49  | 33.99                     | 0.29 | 0.85 |
| 5 × 10 <sup>4</sup>                    | 29.28   | 0.46 | 1.57 | 28.45   | 1.09 | 3.83  | 34.00                     | 0.15 | 0.44 |
| 5 × 10 <sup>5</sup>                    | 25.81   | 0.93 | 3.60 | 26.00   | 0.91 | 3.50  | 45.01                     | 0    | 0    |
| 5 × 10 <sup>6</sup>                    | 22.34   | 0.31 | 1.39 | 23.11   | 0.61 | 2.64  | 45.01                     | 0    | 0    |
| <i>n</i> = 3 (0.8 μM primer and probe) |         |      |      |         |      |       | (5x10 <sup>2</sup> ) RPII |      |      |
| 5 × 10 <sup>2</sup>                    | 42.29   | 3.63 | 8.58 | 42.37   | 3.28 | 7.74  | 33.95                     | 1.34 | 3.95 |
| 5 × 10 <sup>3</sup>                    | 31.85   | 0.75 | 2.35 | 31.52   | 1.01 | 3.20  | 33.37                     | 0.65 | 1.95 |
| 5 × 10 <sup>4</sup>                    | 29.46   | 1.26 | 4.28 | 28.54   | 0.88 | 3.08  | 33.63                     | 0.62 | 1.84 |
| 5 × 10 <sup>5</sup>                    | 25.79   | 0.92 | 3.57 | 25.77   | 0.68 | 2.64  | 45.01                     | 0    | 0    |
| 5 × 10 <sup>6</sup>                    | 22.47   | 0.98 | 4.36 | 22.80   | 0.49 | 2.15  | 45.01                     | 0    | 0    |
| <i>n</i> = 6 (0.4 μM primer and probe) |         |      |      |         |      |       | (5x10 <sup>3</sup> ) RPII |      |      |
| 5 × 10 <sup>2</sup>                    | 44.29   | 2.26 | 5.11 | 44.11   | 2.84 | 6.43  | 29.54                     | 0.43 | 1.47 |
| 5 × 10 <sup>3</sup>                    | 31.67   | 0.49 | 1.55 | 31.60   | 0.26 | 0.81  |                           |      |      |
| 5 × 10 <sup>4</sup>                    | 29.11   | 0.46 | 1.59 | 28.72   | 0.53 | 1.84  |                           |      |      |
| 5 × 10 <sup>5</sup>                    | 25.38   | 0.46 | 1.82 | 25.91   | 0.59 | 2.27  |                           |      |      |
| 5 × 10 <sup>6</sup>                    | 22.27   | 0.57 | 2.55 | 22.55   | 0.53 | 2.33  |                           |      |      |

Mean; Mean of Cycle Time (C<sub>T</sub>); SD; Standard deviation; %CV; The percentage of Coefficient of Variation (between run).

6

7

8

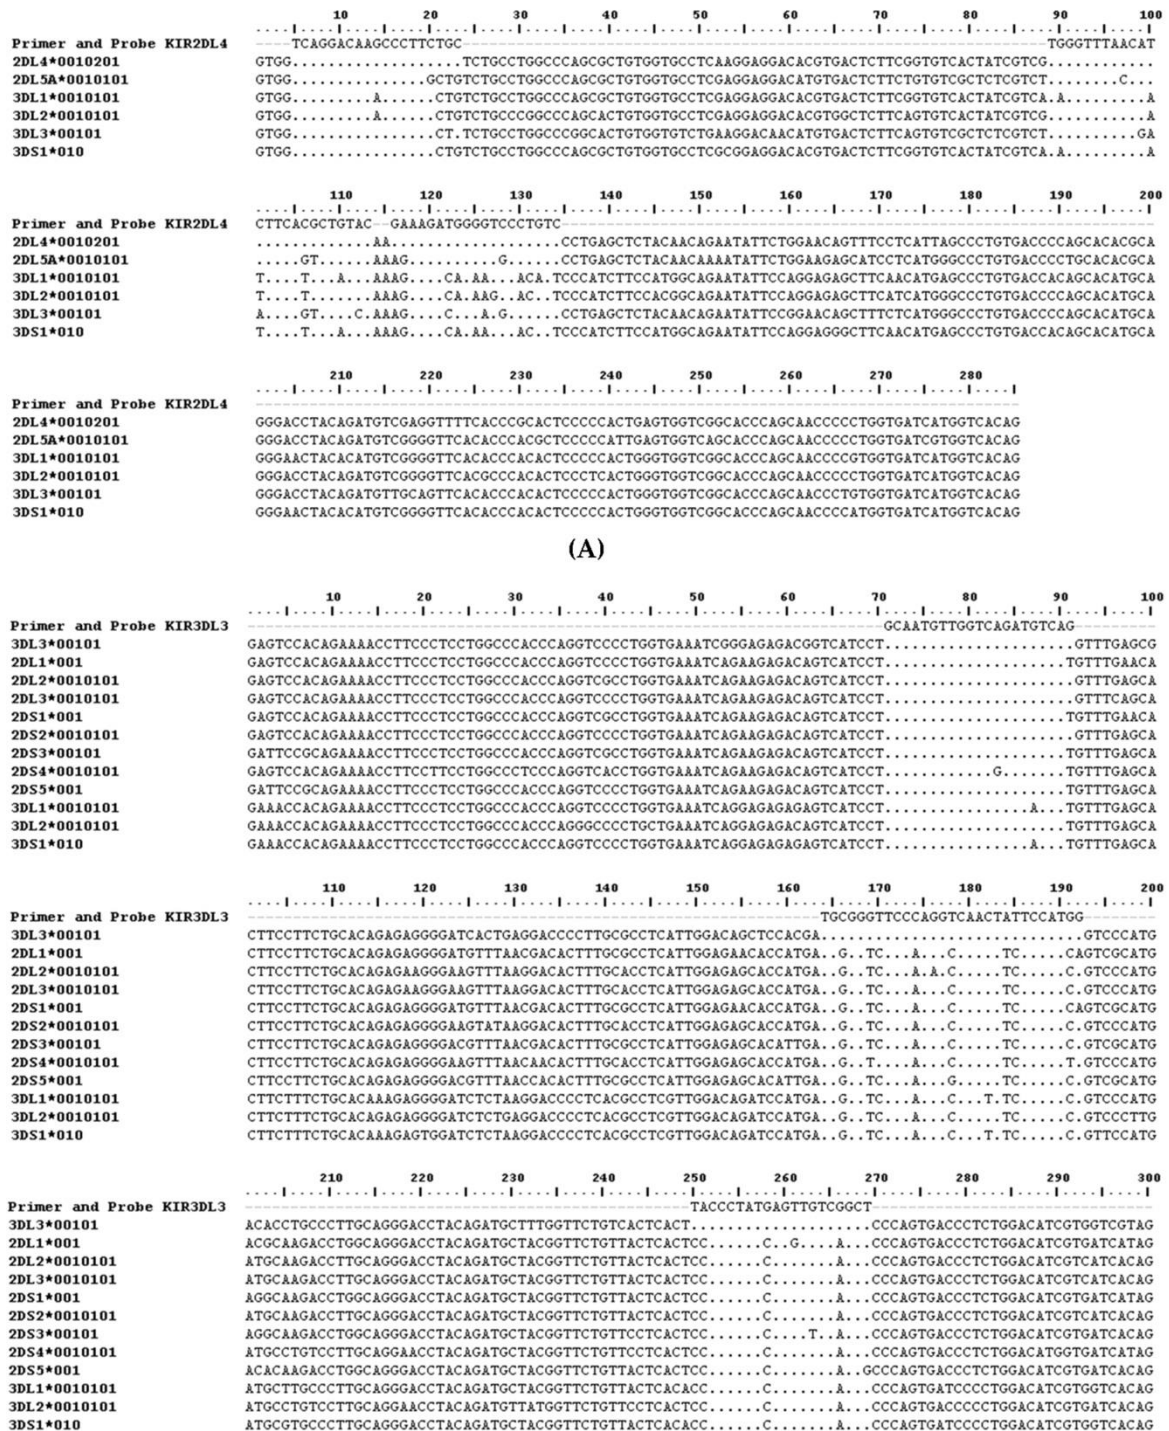

(A)

(B)

**Figure 1.** Comparative multiple-sequence alignments of primer and probe sequences. Primers and probes for KIR2DL4 (A) and KIR3DL3 (B) were aligned with mRNA nucleotide sequences of other KIRs retrieved from the IPD Database using the BioEdit version 7.0.4. Primers and new probes designed between the forward and reverse primers in this study were shown as well as the target sequences for hybridization. Probes and primers located in exon 4 of KIR2DL4 are at the nucleotide positions 5-23, 89-113 and 116-134, and in exon 3 of KIR3DL3 at the nucleotide positions 71-91, 164-193 and 250-269, respectively. A dot represents a nucleotide identity to the reference sequence and a dash represents a gap inserted to obtain optimal alignments.

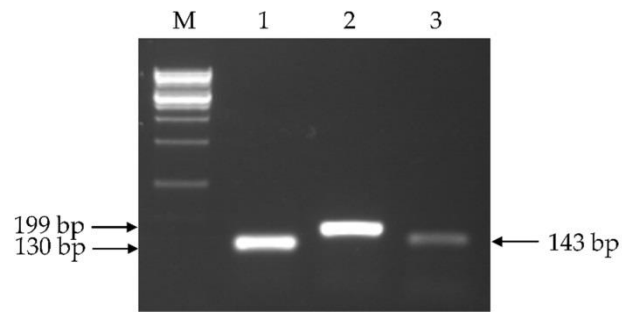

**Figure 2.** Amplification of segmented cDNA of KIR2DL4, KIR3DL3 and RPII by RT-PCR assay. Specific primers were used to generate the 130, 199 and 143bp fragments specific to KIR2DL4, KIR3DL3 and RPII, respectively. M represents the 100 bp DNA ladder. Lane 1: segmented cDNA of KIR2DL4, lane 2: segmented cDNA of KIR3DL3 and lane 3: segmented cDNA of RPII.

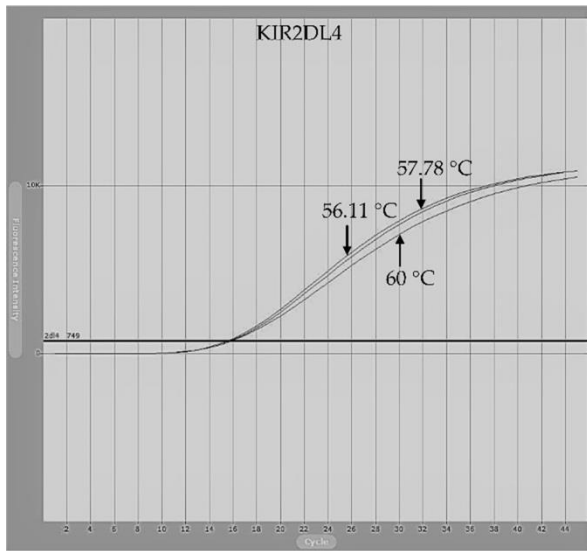

(A)

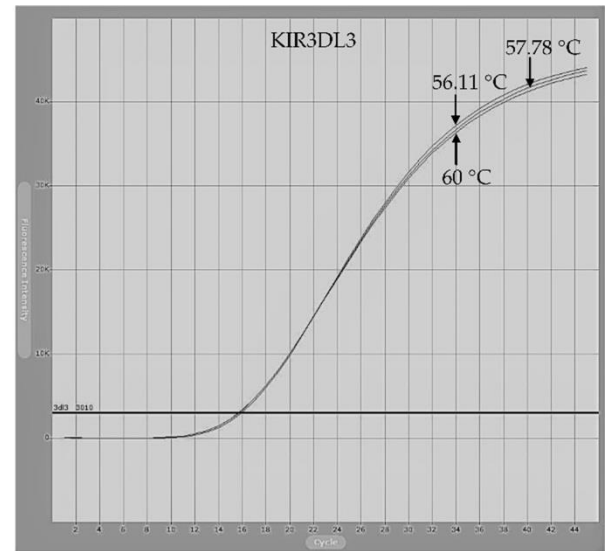

(B)

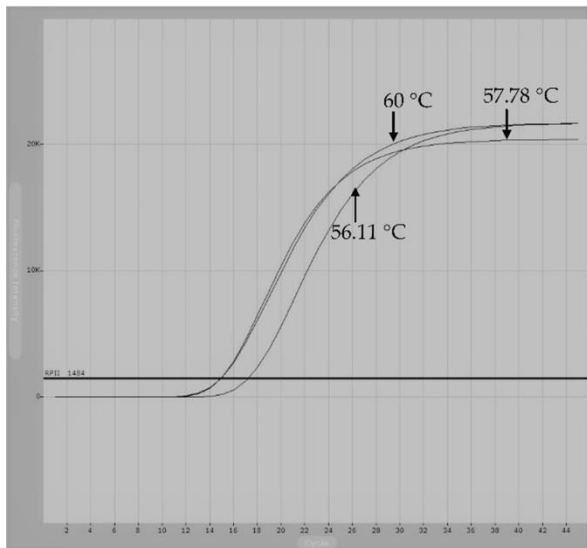

(C)

**Figure 3.** The optimization with varying annealing temperature for qRT-PCR. Standard plasmids ( $10^8$  copies/reaction) were performed with primers and probes of KIR2DL4 (A), KIR3DL3 (B) and RPII (C) at different temperature of 56.11, 57.78 and 60 °C by real-time PCR.

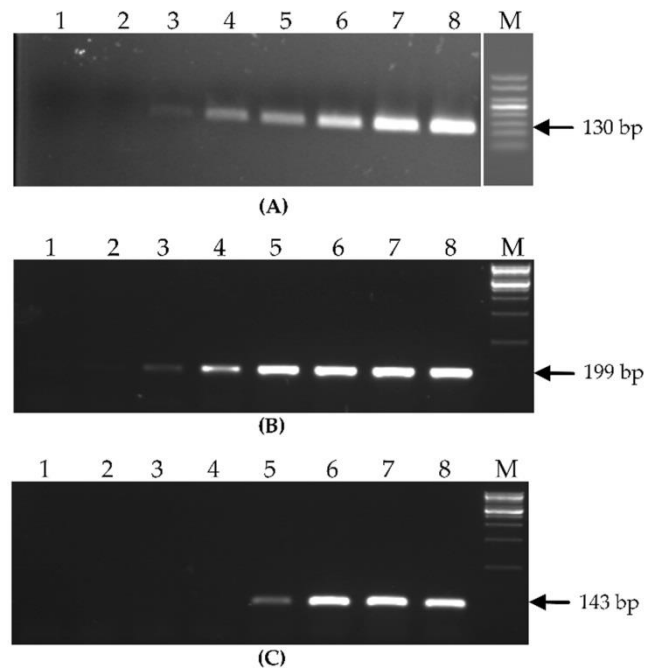

**Figure S4.** The sensitivity of conventional end-point PCR assay for the serial dilutions of standard plasmid DNA. Specific primers for KIR2DL4 (A), KIR3DL3 (B) and RPII (C) were used to amplify the standard plasmid DNA in ten-fold dilution series. Lane 1-8: standard plasmid ranged from 10<sup>1</sup> to 10<sup>8</sup> copies/reaction. M represents the 100 bp DNA ladder except 50 bp ladder for KIR2DL4.



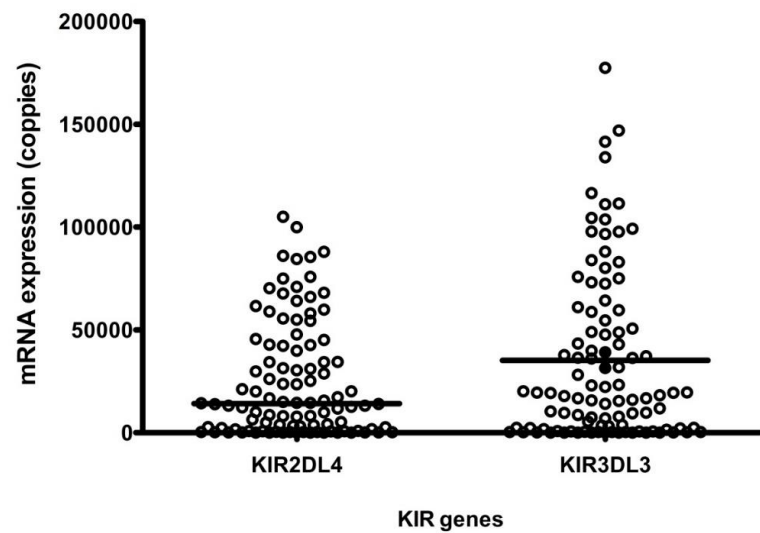

37

38

39

**Figure 5.** KIRs gene expression on clinical samples. A schematic showed frequencies of KIR2DL4 and KIR3DL3 expression in the 100 healthy donors. The data showed as the median copy numbers.
